- and respiration in patients with chronic pulmonary disease studied during the "steady state." *J. Clin Invest* 31:770-781, 1952
2. Doyle JT, Wilson JS, Warren JV: The pulmonary vascular responses to short-term hypoxia in human subjects. *Circulation* 5:263-270, 1952
  3. Duke HN: The site of action of anoxia on the pulmonary blood vessels of the cat. *J. Physiol* 125:373-382, 1954
  4. Patel DJ, Lange RL, Hecht HH: Some evidence for active constriction in the human pulmonary vascular bed. *Circulation* 18:19-24, 1958
  5. Himmelstein A, Harris P, Fritts HW, *et al.* Effect of severe unilateral hypoxia on the partition of pulmonary blood flow in man. *J Thorac Surg* 36:369-381, 1958
  6. Field GB: The effects of posture, oxygen, isoproterenol and atropine on ventilation-perfusion relationships in the lung in asthma. *Clin Sci* 32:279-288, 1967
  7. Sanders CA, Hartborne JW, Heitman II, *et al.*: Effect of vasopressor administration on blood gas exchange in mitral disease. *Clin Res* 13:351, 1965
  8. Fordham RMM, Resnekov, L: Arterial hypoxemia, a side-effect of intravenous isoprenaline used after cardiac surgery. *Thorax* 23: 19-23, 1968
  9. Kreuzer F: Influence of catecholamines on arterial oxygen tension in the anesthetized dog. *J Appl Physiol* 16:1043-1046, 1961
  10. Burton AC: *Physiology and Biophysics of the Circulation*. Chicago, Year Book Medical Publishers Inc., 1965, p 86
  11. Siggaard-Andersen O, Engel K: A new acid-base nomogram. *Scand J Clin Lab Invest* 12:177-186, 1960
  12. Hedley-Whyte J, Radford EP, Laver MB: Nomogram for temperature correction or electrode calibration during  $P_{O_2}$  measurements. *J Appl Physiol* 20:785-786, 1965
  13. Bradley AF, Stupfel M, and Severinghaus JW: Effect of temperature on  $P_{O_2}$  and  $P_{CO_2}$  of blood in vitro. *J Appl Physiol* 9:201-204, 1956
  14. Severinghaus JW: Blood gas concentrations, *Handbook of Physiology*. Section 3, Respiration, vol. 2, 1475-1487, 1965
  15. Rosenthal TB: The effect of temperature on the pH of blood and plasma in vitro. *J. Biol Chem* 173:25-30, 1948
  16. Hamer J, Emanuel R, Norman J *et al.*: Use of a computer in the calibration of dye dilution curves by a dynamic method. *Brit Heart J* 28:147-151, 1966
  17. Finley TN, Lenfant C, Haab P, *et al.*: Venous admixture in the pulmonary circulation of anesthetized dogs. *J Appl Physiol* 15:418-424, 1960
  18. Michenfelder JD, Fowler WS, Theye RA:  $CO_2$  levels and pulmonary shunting in anesthetized man. *J Appl Physiol* 21:1471-1476, 1966
  19. Palmer KNV, Diamant ML: Effect of aerosol isoprenaline on blood gas tensions in severe bronchial asthma. *Lancet* Dec 9, 1232-1233, 1967
  20. Tai E, Read J: Response of blood gas tensions to aminophylline and isoprenaline in patients with asthma. *Thorax* 22:543-549, 1967
  21. Knudson RJ, Constantine HP: An effect of isoproterenol on ventilation-perfusion relations in asthmatic versus normal subjects. *J Appl Physiol* 22:402-406, 1967
  22. Hedley-Whyte J, Corning II, Laver MB, *et al.*: Pulmonary ventilation-perfusion relations after heart valve replacement or repair in man. *J Clin Invest* 44:406-415, 1965
  23. Lloyd TC: Influence of blood pH on hypoxic pulmonary vasoconstriction. *J Appl Physiol* 21:358-364, 1966
  24. Fishman AP: Respiratory gases in the regulation of the pulmonary circulation. *Physiol Rev* 41:214-280, 1961
  25. Silove ED, Inoue T, Grover RF: Comparison of hypoxia, pH, and sympathomimetic drugs on bovine pulmonary vasculature. *J Appl Physiol* 24:355-365, 1968

### Drugs

**PENTAZOCINE IN MAN** Studies were conducted to evaluate the subjective effects of pentazocine in previously addicted volunteers at the National Institute of Mental Health Addiction Research Center in Lexington, Kentucky. Pentazocine produced morphine-like subjective effects. A dose of 60 mg/70 kg, which is higher than the recommended analgesic dose, produced subjective effects which more closely resembled those of nalorphine than those of morphine. Pentazocine did not substitute for morphine in the morphine addict. Pentazocine was much less potent than nalorphine in precipitating abstinence symptoms in morphine-dependent subjects. Long-term administration of pentazocine produced dependence. Pentazocine had an abuse potential less than that found with morphine but greater than that found with nalorphine. (*Jasinski, D. R., Martin, W. R., and Hoeldtke, R. D.: Effects of Short- and Long-term Administration of Pentazocine in Man, Clin. Pharmacol. Ther.* 11: 385 (May) 1970.)
